# Supplementary material for: Sialylation of Human Natural Killer (NK) Cells Is Regulated by IL-2
Source: PubMed Central journal article supplement (PMC7356531; doi:10.3390/jcm9061816), 2020-06-11
Supplement: jcm-09-01816-s001.pdf [file jcm-09-01816-s001.pdf]

**Table S1.** Human sialyltransferases (edited from Takashima et al., 2002 [8]).

| Enzyme        | Amino acid length | Gene              | Chromosomal localization | Substrate                                           |
|---------------|-------------------|-------------------|--------------------------|-----------------------------------------------------|
| ST8Sia I      | 356               | <i>ST8SIA1</i>    | 12p12.1-p11.2            | GM3                                                 |
| ST8Sia II     | 375               | <i>ST8SIA2</i>    | 15q26                    | <i>N</i> -glycan on NCAM                            |
| ST8Sia III    | 380               | <i>ST8SIA3</i>    | 18q21                    | NeuAc $\alpha$ 2,3Gal $\beta$ 1,4GlcNAc-            |
| ST8Sia IV     | 359               | <i>ST8SIA4</i>    | 5q21                     | <i>N</i> -glycan on NCAM                            |
| ST8Sia V      | 376               | <i>ST8SIA5</i>    | 18q12.1-q12.3            | GM1b, GT1b, GD1a, GD3                               |
| ST8Sia VI     | 398               | <i>ST8SIA6</i>    | 10p13                    | NeuAc $\alpha$ 2,3(6)Gal-                           |
| ST6GalNAc I   | 600               | <i>ST6GALNAC1</i> | 17q25                    | GalNAc $\alpha$ 1, <i>O</i> -Ser/Thr                |
| ST6GalNAc II  | 374               | <i>ST6GALNAC2</i> | 17q25                    | Gal $\beta$ 1,3GalNAc $\alpha$ 1, <i>O</i> -Ser/Thr |
| ST6GalNAc III | 305               | <i>ST6GALNAC3</i> | 1p31.1-p31.2             | NeuAc $\alpha$ 2,3Gal $\beta$ 1,3GalNAc-(Lipid)*    |
| ST6GalNAc IV  | 302               | <i>ST6GALNAC4</i> | 9q34                     | NeuAc $\alpha$ 2,3Gal $\beta$ 1,3GalNAc-(Protein)*  |
| ST6GalNAc V   | 336               | <i>ST6GALNAC5</i> | 1p31.1                   | GM1b                                                |
| ST6GalNAc VI  | 299               | <i>ST6GALNAC6</i> | 9q34                     | GM1b, GT1b, GD1a                                    |
| ST6Gal I      | 406               | <i>ST6GAL1</i>    | 3q27-q28                 | Gal $\beta$ 1,4GlcNAc-                              |
| ST6Gal II     | 529               | <i>ST6GAL2</i>    | 2q11.2-q12.1             | Gal $\beta$ 1,4GlcNAc-                              |
| ST3Gal I      | 340               | <i>ST3GAL1</i>    | 8q24.2                   | Gal $\beta$ 1,3GalNAc-(Protein)*                    |
| ST3Gal II     | 350               | <i>ST3GAL2</i>    | 16q21-22.3               | Gal $\beta$ 1,3GalNAc-(Lipid)*                      |
| ST3Gal III    | 375               | <i>ST3GAL3</i>    | 1pter-p32.3              | Gal $\beta$ 1,3(4)GlcNAc-                           |
| ST3Gal IV     | 329               | <i>ST3GAL4</i>    | 11q23-q24                | Gal $\beta$ 1,4(3)GlcNAc-                           |
| ST3Gal V      | 362               | <i>ST3GAL5</i>    | 2p24.3-p24.1             | Lac-Cer                                             |
| ST3Gal VI     | 331               | <i>ST3GAL6</i>    | 3p21.1-q13.2             | Gal $\beta$ 1,4GlcNAc-                              |

\* preferential but not specific substrate. Lac-Cer (lactosylceramide), GM (monosialoganglioside), GD (disialoganglioside), GT (trisialogangliosid).

(a)

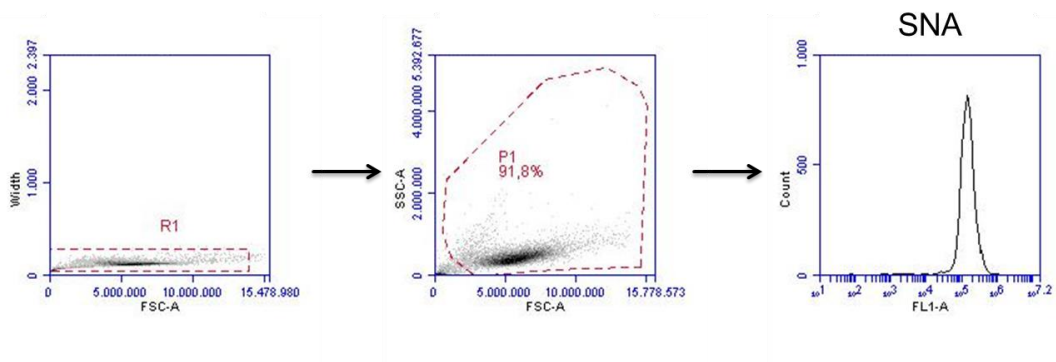

(b)

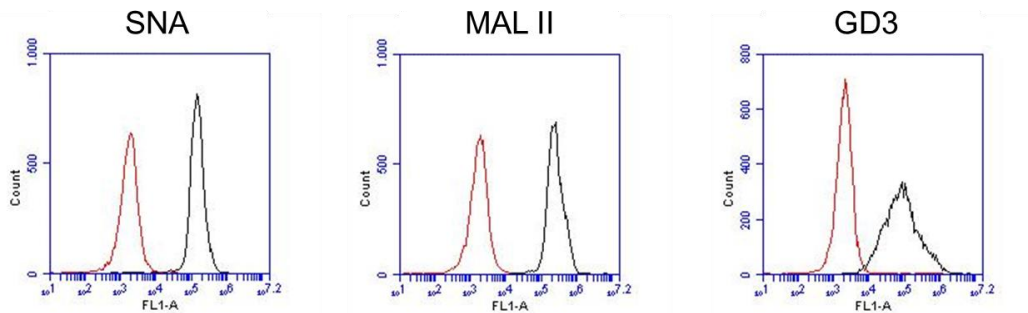

**Figure S1.** Gating strategy for flow cytometry. (a) Forward scatter (FSC) area against width was used for doublet discrimination whereas FSC versus sideward scatter (SSC) was used for removal of debris. 10,000 events were recorded in the P1 gate and analyzed in the FL1 channel. A representative histogram for Sambucus Nigra Lectin (SNA) is shown as an example. (b) Representative histograms from the staining with SNA, Maackia Amurensis Lectin II (MAL II) or GD3 are shown in black. The red histogram represents the streptavidin (for SNA and MAL II) or secondary antibody control (for GD3).

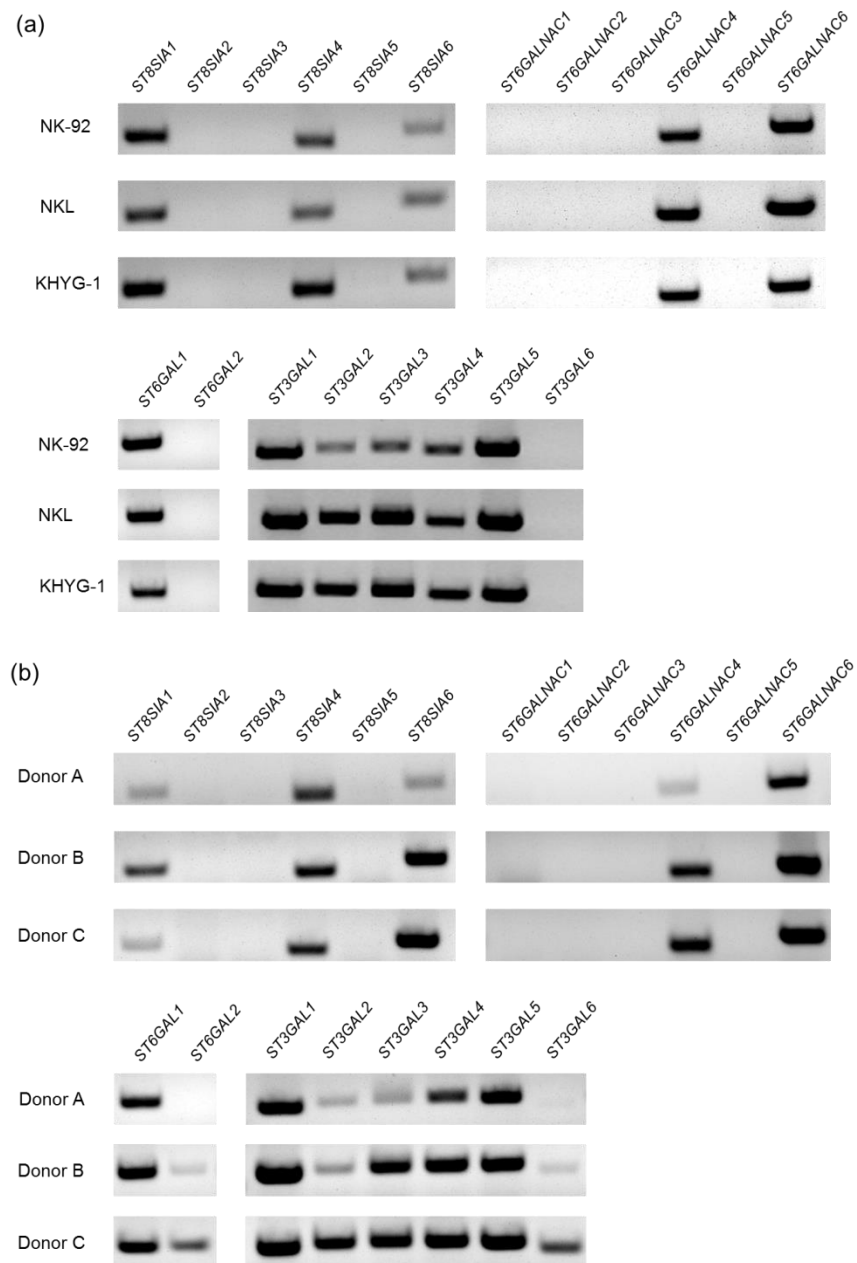

**Figure S2.** Sialyltransferase expression in NK cells. RNA was isolated from the human NK cell lines NK-92, NKL, KHYG-1 and primary NK cell. cDNA was synthesized and PCR reactions were performed with primer pairs for all 20 human sialyltransferases. **(a)** Representative agarose gels are shown from 3 independent experiments performed with cDNA derived from the NK cell lines. **(b)** Gels from 3 independent experiments performed with cDNA derived from 3 healthy blood donors are shown. For product sizes see Table 1.

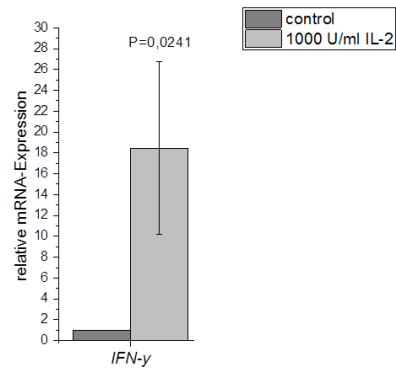

**Figure S3.** Expression of *IFN- $\gamma$*  in NK-92 cells after activation with IL-2. NK-92 cells were incubated without IL-2 for 24 h. Afterwards, cells were either left untreated (control) or treated with 1000 U/ml IL-2 for 4 h. cDNA was synthesized and quantitative real-time PCR reactions were performed. Data were normalized to Beta-2 microglobulin (*B2M*) expression. Graphs show average mean  $\pm$  SD of 4 independent experiments.
